# Supplementary material
Source: HighWire-hosted journal article supplement (https://www.jneurosci.org/content/38/10/2551)
Supplement: inline-supplementary-material-7 [file inline-supplementary-material-7.xlsx]

## Sheet: QKI target
Figure 5-2 | Myelin-related and QKI putative target genes differentially expressed (P <0.05, Student's t-test, unpaired, 2-tailed) in auditory nerve (AN) following noise injury for any pairwise relationship. Asterisk indicates differential expression for the respective pairwise comparisons. Mean indicates average of log2 expression measures. Cluster number refers to groups defined in Figure 5d; o…
Differentially expressed genes			AN: Immediate v Control						AN: 1d v Control						AN: 7d v Control						AN: 14d v Control						AN: 1d v Immediate						AN: 7d v Immediate						AN: 14d v Immediate						AN: 7d v 1d
Gene Symbol	Gene Title	Probe Set ID	Con mean	Imd mean	difference of means	Fold	P value	filtered	Con mean	1d mean	difference of means	Fold	P value	filtered	Con mean	7d mean	difference of means	Fold	P value	filtered	Con mean	14d mean	difference of means	Fold	P value	filtered	Imd mean	1d mean	difference of means	Fold	P value	filtered	Imd mean	7d mean	difference of means	Fold	P value	filtered	Imd mean	14d mean	difference of means	Fold	P value	filtered	1d mean	7d mean	difference of means	Fold	P value
Rdx	radixin	1416179_a_at	10.08	10.38	0.31	1.23971	0.142744		10.08	10.27	0.2	1.1487	0.388923		10.08	10.01	-0.07	-1.04972	0.728627		10.08	10.06	-0.01	-1.00696	0.934169		10.38	10.27	-0.11	-1.07923	0.548329		10.38	10.01	-0.38	-1.30134	0.085687		10.38	10.06	-0.32	-1.24833	0.011894	*	10.27	10.01	-0.27	-1.20581	0.25177
Fos	FBJ osteosarcoma oncogene	1423100_at	6.92	9.87	2.96	7.78124	0.011054	*	6.92	8.67	1.76	3.38698	0.003702	*	6.92	7.95	1.03	2.04202	0.16118		6.92	7.77	0.85	1.8025	0.158412		9.87	8.67	-1.2	-2.2974	0.105446		9.87	7.95	-1.93	-3.81055	0.044858	*	9.87	7.77	-2.11	-4.31691	0.025219	*	8.67	7.95	-0.73	-1.65864	0.276679
Wnk1	WNK lysine deficient protein kinase 1	1436746_at	10.74	10.94	0.2	1.1487	0.05434		10.74	10.78	0.04	1.02811	0.451948		10.74	10.74	0	-1	0.999994		10.74	10.68	-0.06	-1.04247	0.188734		10.94	10.78	-0.17	-1.12506	0.082863		10.94	10.74	-0.2	-1.1487	0.099647		10.94	10.68	-0.26	-1.19748	0.031725	*	10.78	10.74	-0.04	-1.02811	0.684841
Cdk5rap2 /// Ywhaq	CDK5 regulatory subunit associated protein 2 /// tyrosine 3-monooxygenase/tryptophan 5-monooxygenase activation protein, theta polypeptide	1420830_x_at	11.63	11.67	0.04	1.02811	0.156588		11.63	11.54	-0.08	-1.05702	0.029564	*	11.63	11.53	-0.09	-1.06437	0.033863	*	11.63	11.54	-0.08	-1.05702	0.0259	*	11.67	11.54	-0.12	-1.08673	0.001677	*	11.67	11.53	-0.13	-1.09429	0.005159	*	11.67	11.54	-0.12	-1.08673	0.001915	*	11.54	11.53	-0.01	-1.00696	0.378531
Cdk5rap2 /// Ywhaq	CDK5 regulatory subunit associated protein 2 /// tyrosine 3-monooxygenase/tryptophan 5-monooxygenase activation protein, theta polypeptide	1420829_a_at	10.93	11.08	0.14	1.10191	0.001572	*	10.93	10.89	-0.04	-1.02811	0.153271		10.93	10.87	-0.06	-1.04247	0.24918		10.93	10.92	-0.02	-1.01396	0.685416		11.08	10.89	-0.18	-1.13288	0.002199	*	11.08	10.87	-0.2	-1.1487	0.023849	*	11.08	10.92	-0.16	-1.11729	0.034361	*	10.89	10.87	-0.02	-1.01396	0.666549
Nf1	neurofibromatosis 1	1452525_a_at	5.13	5.33	0.19	1.14076	0.198578		5.13	5.03	-0.1	-1.07177	0.457423		5.13	4.92	-0.22	-1.16473	0.335544		5.13	5.13	0	-1	1		5.33	5.03	-0.29	-1.22264	0.013583	*	5.33	4.92	-0.41	-1.32869	0.119269		5.33	5.13	-0.19	-1.14076	0.061147		5.03	4.92	-0.12	-1.08673	0.55457
Nkd1	naked cuticle 1 homolog (Drosophila)	1417278_a_at	5.94	6.16	0.22	1.16473	0.075773		5.94	6.12	0.18	1.13288	0.032974	*	5.94	6.09	0.16	1.11729	0.098442		5.94	6.03	0.09	1.06437	0.537384		6.16	6.12	-0.04	-1.02811	0.66084		6.16	6.09	-0.07	-1.04972	0.508281		6.16	6.03	-0.13	-1.09429	0.431503		6.12	6.09	-0.03	-1.02101	0.732698
Cdk5rap2 /// Gm2423 /// Ywhaq	CDK5 regulatory subunit associated protein 2 /// predicted gene 2423 /// tyrosine 3-monooxygenase/tryptophan 5-monooxygenase activation protein, theta polypeptide	1420828_s_at	11.7	11.79	0.1	1.07177	0.014427	*	11.7	11.75	0.06	1.04247	0.091474		11.7	11.78	0.08	1.05702	0.060204		11.7	11.79	0.1	1.07177	0.013993	*	11.79	11.75	-0.04	-1.02811	0.169025		11.79	11.78	-0.01	-1.00696	0.675742		11.79	11.79	0	-1	0.999988		11.75	11.78	0.03	1.02101	0.44572
Slc18a2	solute carrier family 18 (vesicular monoamine), member 2	1437079_at	4.93	5.23	0.3	1.23114	0.132315		4.93	5.05	0.12	1.08673	0.15823		4.93	4.98	0.04	1.02811	0.77633		4.93	5.15	0.22	1.16473	0.042669	*	5.23	5.05	-0.18	-1.13288	0.289334		5.23	4.98	-0.26	-1.19748	0.229728		5.23	5.15	-0.08	-1.05702	0.600025		5.05	4.98	-0.07	-1.04972	0.628614
Canx	calnexin	1422845_at	10	10.27	0.27	1.20581	0.032066	*	10	10.11	0.11	1.07923	0.295228		10	10.09	0.09	1.06437	0.628027		10	10.17	0.17	1.12506	0.100804		10.27	10.11	-0.16	-1.11729	0.164349		10.27	10.09	-0.18	-1.13288	0.363677		10.27	10.17	-0.1	-1.07177	0.215623		10.11	10.09	-0.02	-1.01396	0.899338
Mgat2	mannoside acetylglucosaminyltransferase 2	1452037_at	8.61	8.78	0.17	1.12506	0.025956	*	8.61	8.66	0.05	1.03526	0.336869		8.61	8.7	0.1	1.07177	0.226861		8.61	8.63	0.02	1.01396	0.698186		8.78	8.66	-0.12	-1.08673	0.059972		8.78	8.7	-0.07	-1.04972	0.336352		8.78	8.63	-0.15	-1.10957	0.061134		8.66	8.7	0.05	1.03526	0.51101
Cyp51	cytochrome P450, family 51	1422533_at	5.81	6.5	0.69	1.61328	0.017285	*	5.81	5.76	-0.05	-1.03526	0.813965		5.81	6.14	0.33	1.25701	0.16669		5.81	5.93	0.12	1.08673	0.492421		6.5	5.76	-0.75	-1.68179	0.024702	*	6.5	6.14	-0.37	-1.29235	0.105365		6.5	5.93	-0.57	-1.48452	0.013424	*	5.76	6.14	0.38	1.30134	0.151949
Txnl1	thioredoxin-like 1	1423299_at	9.91	10	0.09	1.06437	0.082617		9.91	10.06	0.15	1.10957	0.002486	*	9.91	9.96	0.05	1.03526	0.274673		9.91	9.95	0.04	1.02811	0.293351		10	10.06	0.06	1.04247	0.179071		10	9.96	-0.04	-1.02811	0.446188		10	9.95	-0.05	-1.03526	0.271028		10.06	9.96	-0.1	-1.07177	0.09308
Ssb	Sjogren syndrome antigen B	1416421_a_at	8.83	9.03	0.2	1.1487	0.133925		8.83	9.04	0.21	1.15669	0.119463		8.83	8.66	-0.17	-1.12506	0.212483		8.83	8.78	-0.05	-1.03526	0.651998		9.03	9.04	0.01	1.00696	0.897982		9.03	8.66	-0.37	-1.29235	0.028801	*	9.03	8.78	-0.25	-1.18921	0.025836	*	9.04	8.66	-0.38	-1.30134	0.01965
Cdk5rap2 /// Ywhaq	CDK5 regulatory subunit associated protein 2 /// tyrosine 3-monooxygenase/tryptophan 5-monooxygenase activation protein, theta polypeptide	1437608_x_at	10.25	10.29	0.04	1.02811	0.582275		10.25	10.27	0.02	1.01396	0.756269		10.25	10.14	-0.11	-1.07923	0.19122		10.25	10.17	-0.08	-1.05702	0.286569		10.29	10.27	-0.02	-1.01396	0.422346		10.29	10.14	-0.14	-1.10191	0.03443	*	10.29	10.17	-0.12	-1.08673	0.018533	*	10.27	10.14	-0.13	-1.09429	0.050358
Cdk5rap2 /// Ywhaq	CDK5 regulatory subunit associated protein 2 /// tyrosine 3-monooxygenase/tryptophan 5-monooxygenase activation protein, theta polypeptide	1460621_x_at	11.98	12.05	0.07	1.04972	0.150527		11.98	11.95	-0.03	-1.02101	0.481582		11.98	11.92	-0.06	-1.04247	0.219534		11.98	11.91	-0.07	-1.04972	0.136884		12.05	11.95	-0.1	-1.07177	0.052716		12.05	11.92	-0.13	-1.09429	0.021175	*	12.05	11.91	-0.14	-1.10191	0.001359	*	11.95	11.92	-0.03	-1.02101	0.52212
Mgat2	mannoside acetylglucosaminyltransferase 2	1426350_at	7.64	8.03	0.39	1.31039	0.160214		7.64	7.79	0.14	1.10191	0.533537		7.64	7.53	-0.11	-1.07923	0.627557		7.64	7.51	-0.13	-1.09429	0.535475		8.03	7.79	-0.24	-1.18099	0.150416		8.03	7.53	-0.5	-1.41421	0.053171		8.03	7.51	-0.52	-1.43396	0.011033	*	7.79	7.53	-0.26	-1.19748	0.186566
Cdk5rap2 /// Gm2423 /// Ywhaq	CDK5 regulatory subunit associated protein 2 /// predicted gene 2423 /// tyrosine 3-monooxygenase/tryptophan 5-monooxygenase activation protein, theta polypeptide	1436846_x_at	11.06	11.15	0.09	1.06437	0.203185		11.06	11.12	0.06	1.04247	0.294063		11.06	10.98	-0.08	-1.05702	0.215225		11.06	11.05	-0.01	-1.00696	0.850175		11.15	11.12	-0.03	-1.02101	0.568906		11.15	10.98	-0.17	-1.12506	0.025795	*	11.15	11.05	-0.1	-1.07177	0.172156		11.12	10.98	-0.14	-1.10191	0.012643
Cdk5rap2 /// Gm2423 /// Ywhaq	CDK5 regulatory subunit associated protein 2 /// predicted gene 2423 /// tyrosine 3-monooxygenase/tryptophan 5-monooxygenase activation protein, theta polypeptide	1432842_s_at	11.57	11.74	0.17	1.12506	0.028516	*	11.57	11.65	0.08	1.05702	0.231996		11.57	11.5	-0.08	-1.05702	0.49419		11.57	11.61	0.03	1.02101	0.484067		11.74	11.65	-0.09	-1.06437	0.167431		11.74	11.5	-0.24	-1.18099	0.102814		11.74	11.61	-0.13	-1.09429	0.021166	*	11.65	11.5	-0.16	-1.11729	0.216198
Commd1	COMM domain containing 1	1424121_at	8.07	8.11	0.04	1.02811	0.735067		8.07	8.14	0.08	1.05702	0.56223		8.07	7.82	-0.25	-1.18921	0.096431		8.07	7.92	-0.15	-1.10957	0.261177		8.11	8.14	0.03	1.02101	0.774083		8.11	7.82	-0.29	-1.22264	0.03977	*	8.11	7.92	-0.19	-1.14076	0.118925		8.14	7.82	-0.33	-1.25701	0.032427
Cct2	chaperonin containing Tcp1, subunit 2 (beta)	1433534_a_at	9.98	10.35	0.37	1.29235	0.193293		9.98	10.26	0.29	1.22264	0.283882		9.98	9.81	-0.16	-1.11729	0.521492		9.98	9.94	-0.04	-1.02811	0.862403		10.35	10.26	-0.09	-1.06437	0.454104		10.35	9.81	-0.54	-1.45397	0.024335	*	10.35	9.94	-0.41	-1.32869	0.008673	*	10.26	9.81	-0.45	-1.36604	0.036379
Txnl1	thioredoxin-like 1	1455866_x_at	2.98	3.02	0.05	1.03526	0.404215		2.98	3.02	0.04	1.02811	0.467096		2.98	2.96	-0.01	-1.00696	0.809955		2.98	2.95	-0.02	-1.01396	0.649539		3.02	3.02	0	-1	0.930328		3.02	2.96	-0.06	-1.04247	0.144659		3.02	2.95	-0.07	-1.04972	0.039326	*	3.02	2.96	-0.06	-1.04247	0.236052
Qk	quaking	1429318_a_at	11.31	11.23	-0.07	-1.04972	0.448559		11.31	11.43	0.12	1.08673	0.099194		11.31	11.27	-0.04	-1.02811	0.486931		11.31	11.3	0	-1	0.972001		11.23	11.43	0.19	1.14076	0.10704		11.23	11.27	0.04	1.02811	0.685978		11.23	11.3	0.07	1.04972	0.55589		11.43	11.27	-0.16	-1.11729	0.043332
Psmc3	proteasome (prosome, macropain) 26S subunit, ATPase 3	1416282_at	10.68	10.59	-0.09	-1.06437	0.010303	*	10.68	10.75	0.07	1.04972	0.236588		10.68	10.72	0.04	1.02811	0.109185		10.68	10.68	0.01	1.00696	0.69477		10.59	10.75	0.16	1.11729	0.058612		10.59	10.72	0.13	1.09429	0.003823	*	10.59	10.68	0.1	1.07177	0.003808	*	10.75	10.72	-0.03	-1.02101	0.60421
Blvrb	biliverdin reductase B (flavin reductase (NADPH))	1451386_at	7.65	7.5	-0.15	-1.10957	0.177955		7.65	7.98	0.33	1.25701	0.064902		7.65	7.61	-0.04	-1.02811	0.738389		7.65	7.66	0.01	1.00696	0.875753		7.5	7.98	0.48	1.39474	0.024609	*	7.5	7.61	0.11	1.07923	0.304811		7.5	7.66	0.16	1.11729	0.091892		7.98	7.61	-0.37	-1.29235	0.050272
Cdc42	cell division cycle 42	1449574_a_at	11.06	11.1	0.04	1.02811	0.579273		11.06	11.26	0.2	1.1487	0.049277	*	11.06	11.22	0.16	1.11729	0.139693		11.06	11.16	0.1	1.07177	0.171276		11.1	11.26	0.16	1.11729	0.065625		11.1	11.22	0.12	1.08673	0.208795		11.1	11.16	0.07	1.04972	0.177066		11.26	11.22	-0.04	-1.02811	0.636147
Sept2	septin 2	1423472_at	9.85	9.77	-0.08	-1.05702	0.029914	*	9.85	9.82	-0.03	-1.02101	0.259733		9.85	9.8	-0.06	-1.04247	0.42274		9.85	9.83	-0.03	-1.02101	0.495597		9.77	9.82	0.05	1.03526	0.11005		9.77	9.8	0.02	1.01396	0.721952		9.77	9.83	0.05	1.03526	0.207261		9.82	9.8	-0.02	-1.01396	0.723852
Rcn3	reticulocalbin 3, EF-hand calcium binding domain	1424382_at	8.85	8.77	-0.08	-1.05702	0.016249	*	8.85	8.83	-0.02	-1.01396	0.654834		8.85	8.74	-0.12	-1.08673	0.266992		8.85	8.9	0.04	1.02811	0.493068		8.77	8.83	0.06	1.04247	0.250697		8.77	8.74	-0.04	-1.02811	0.680569		8.77	8.9	0.12	1.08673	0.139431		8.83	8.74	-0.1	-1.07177	0.343231
Synpr	synaptoporin	1423640_at	3.84	4.01	0.17	1.12506	0.599166		3.84	4.31	0.47	1.38511	0.014665	*	3.84	3.89	0.05	1.03526	0.896917		3.84	4.02	0.17	1.12506	0.462844		4.01	4.31	0.3	1.23114	0.371349		4.01	3.89	-0.12	-1.08673	0.785171		4.01	4.02	0.01	1.00696	0.984739		4.31	3.89	-0.42	-1.33793	0.309401
LOC106740 /// Phf10	uncharacterized LOC106740 /// PHD finger protein 10	1435774_at	7.09	7.11	0.01	1.00696	0.783121		7.09	7.26	0.17	1.12506	0.085741		7.09	6.99	-0.1	-1.07177	0.44637		7.09	6.91	-0.19	-1.14076	0.169398		7.11	7.26	0.15	1.10957	0.104121		7.11	6.99	-0.11	-1.07923	0.393496		7.11	6.91	-0.2	-1.1487	0.154021		7.26	6.99	-0.27	-1.20581	0.10893
Gm6756 /// Phgdh	3-phosphoglycerate dehydrogenase pseudogene /// 3-phosphoglycerate dehydrogenase	1456471_x_at	7.73	7.65	-0.07	-1.04972	0.349078		7.73	7.77	0.05	1.03526	0.522388		7.73	7.7	-0.02	-1.01396	0.765395		7.73	7.61	-0.12	-1.08673	0.24149		7.65	7.77	0.12	1.08673	0.031732	*	7.65	7.7	0.05	1.03526	0.385497		7.65	7.61	-0.04	-1.02811	0.567176		7.77	7.7	-0.07	-1.04972	0.233678
Phgdh	3-phosphoglycerate dehydrogenase	1454714_x_at	9.41	9.34	-0.07	-1.04972	0.367556		9.41	9.51	0.11	1.07923	0.213914		9.41	9.41	0	-1	0.96736		9.41	9.33	-0.08	-1.05702	0.350999		9.34	9.51	0.18	1.13288	0.013673	*	9.34	9.41	0.07	1.04972	0.25093		9.34	9.33	-0.01	-1.00696	0.872432		9.51	9.41	-0.1	-1.07177	0.141916
Cdc42	cell division cycle 42	1460708_s_at	10.51	10.52	0.01	1.00696	0.930851		10.51	10.77	0.25	1.18921	0.039703	*	10.51	10.49	-0.02	-1.01396	0.886304		10.51	10.48	-0.03	-1.02101	0.617258		10.52	10.77	0.24	1.18099	0.112842		10.52	10.49	-0.03	-1.02101	0.85394		10.52	10.48	-0.04	-1.02811	0.723552		10.77	10.49	-0.27	-1.20581	0.13371
Txnl1	thioredoxin-like 1	1436947_a_at	10.42	10.43	0.01	1.00696	0.895031		10.42	10.6	0.18	1.13288	0.103737		10.42	10.44	0.02	1.01396	0.824364		10.42	10.43	0.01	1.00696	0.93167		10.43	10.6	0.17	1.12506	0.003963	*	10.43	10.44	0.01	1.00696	0.762866		10.43	10.43	0	-1	0.922267		10.6	10.44	-0.16	-1.11729	0.007055
Qk	quaking	1451179_a_at	10.64	10.67	0.03	1.02101	0.674331		10.64	11.01	0.37	1.29235	0.008256	*	10.64	10.5	-0.14	-1.10191	0.091386		10.64	10.6	-0.03	-1.02101	0.510646		10.67	11.01	0.34	1.26576	0.011822	*	10.67	10.5	-0.17	-1.12506	0.075711		10.67	10.6	-0.06	-1.04247	0.349148		11.01	10.5	-0.51	-1.42405	0.002749
Rps4x	ribosomal protein S4, X-linked	1416276_a_at	12.73	12.67	-0.05	-1.03526	0.099301		12.73	12.75	0.02	1.01396	0.339562		12.73	12.7	-0.03	-1.02101	0.437099		12.73	12.76	0.03	1.02101	0.241522		12.67	12.75	0.08	1.05702	0.028382	*	12.67	12.7	0.02	1.01396	0.537641		12.67	12.76	0.08	1.05702	0.022151	*	12.75	12.7	-0.05	-1.03526	0.199844
Vkorc1	vitamin K epoxide reductase complex, subunit 1	1452770_at	9.55	9.5	-0.05	-1.03526	0.084001		9.55	9.65	0.1	1.07177	0.008771	*	9.55	9.57	0.02	1.01396	0.734681		9.55	9.63	0.08	1.05702	0.015287	*	9.5	9.65	0.14	1.10191	0.001394	*	9.5	9.57	0.07	1.04972	0.356991		9.5	9.63	0.13	1.09429	0.002321	*	9.65	9.57	-0.07	-1.04972	0.339088
LOC102642689 /// Rpsa	40S ribosomal protein SA /// ribosomal protein SA	1448245_at	12.18	11.99	-0.2	-1.1487	0.025272	*	12.18	12.21	0.03	1.02101	0.495095		12.18	12.03	-0.15	-1.10957	0.031682	*	12.18	12.08	-0.1	-1.07177	0.07568		11.99	12.21	0.23	1.17283	0.019156	*	11.99	12.03	0.04	1.02811	0.42483		11.99	12.08	0.1	1.07177	0.145107		12.21	12.03	-0.18	-1.13288	0.004871
Commd1	COMM domain containing 1	1424122_s_at	9.32	9.16	-0.16	-1.11729	0.110454		9.32	9.38	0.06	1.04247	0.379419		9.32	9.26	-0.06	-1.04247	0.571762		9.32	9.31	-0.01	-1.00696	0.887721		9.16	9.38	0.23	1.17283	0.041922	*	9.16	9.26	0.11	1.07923	0.319436		9.16	9.31	0.15	1.10957	0.10063		9.38	9.26	-0.12	-1.08673	0.237229
Phgdh	3-phosphoglycerate dehydrogenase	1456584_x_at	8.39	8.35	-0.04	-1.02811	0.647629		8.39	8.49	0.11	1.07923	0.23137		8.39	8.39	0	-1	1		8.39	8.37	-0.01	-1.00696	0.887945		8.35	8.49	0.14	1.10191	0.033207	*	8.35	8.39	0.04	1.02811	0.532798		8.35	8.37	0.02	1.01396	0.762427		8.49	8.39	-0.11	-1.07923	0.105096
Psph	phosphoserine phosphatase	1415673_at	7.35	7.29	-0.06	-1.04247	0.503919		7.35	7.58	0.22	1.16473	0.002153	*	7.35	7.33	-0.02	-1.01396	0.738911		7.35	7.42	0.07	1.04972	0.024097	*	7.29	7.58	0.29	1.22264	0.057747		7.29	7.33	0.04	1.02811	0.707161		7.29	7.42	0.13	1.09429	0.22719		7.58	7.33	-0.25	-1.18921	0.04206
Rbp1	retinol binding protein 1, cellular	1448754_at	11.32	11.22	-0.1	-1.07177	0.38778		11.32	11.56	0.24	1.18099	0.118684		11.32	11.35	0.03	1.02101	0.92695		11.32	11.37	0.05	1.03526	0.833929		11.22	11.56	0.34	1.26576	0.0431	*	11.22	11.35	0.13	1.09429	0.697908		11.22	11.37	0.15	1.10957	0.556556		11.56	11.35	-0.21	-1.15669	0.539385
Phgdh	3-phosphoglycerate dehydrogenase	1426658_x_at	8.66	8.5	-0.16	-1.11729	0.029158	*	8.66	8.72	0.06	1.04247	0.424994		8.66	8.75	0.09	1.06437	0.355718		8.66	8.63	-0.03	-1.02101	0.239243		8.5	8.72	0.22	1.16473	0.047397	*	8.5	8.75	0.25	1.18921	0.067812		8.5	8.63	0.13	1.09429	0.03749	*	8.72	8.75	0.03	1.02101	0.754044
Tcp1	t-complex protein 1	1448122_at	10.89	10.92	0.03	1.02101	0.385114		10.89	10.98	0.08	1.05702	0.173808		10.89	10.96	0.07	1.04972	0.047171	*	10.89	10.95	0.05	1.03526	0.093099		10.92	10.98	0.06	1.04247	0.313209		10.92	10.96	0.04	1.02811	0.202537		10.92	10.95	0.03	1.02101	0.376407		10.98	10.96	-0.02	-1.01396	0.737035
Gm8096 /// Phgdh	3-phosphoglycerate dehydrogenase pseudogene /// 3-phosphoglycerate dehydrogenase	1426657_s_at	7.51	7.55	0.05	1.03526	0.558296		7.51	7.73	0.23	1.17283	0.044136	*	7.51	7.7	0.19	1.14076	0.242792		7.51	7.64	0.14	1.10191	0.137777		7.55	7.73	0.18	1.13288	0.059303		7.55	7.7	0.14	1.10191	0.34644		7.55	7.64	0.09	1.06437	0.220815		7.73	7.7	-0.04	-1.02811	0.79425
Bcar1	breast cancer anti-estrogen resistance 1	1439388_s_at	8.85	8.8	-0.05	-1.03526	0.217346		8.85	8.98	0.13	1.09429	0.010889	*	8.85	8.76	-0.09	-1.06437	0.18191		8.85	8.8	-0.06	-1.04247	0.551596		8.8	8.98	0.18	1.13288	0.006765	*	8.8	8.76	-0.04	-1.02811	0.503795		8.8	8.8	-0.01	-1.00696	0.942117		8.98	8.76	-0.22	-1.16473	0.029217
Nkd1	naked cuticle 1 homolog (Drosophila)	1440446_at	4.85	4.86	0.02	1.01396	0.786218		4.85	4.9	0.06	1.04247	0.0331	*	4.85	4.83	-0.02	-1.01396	0.845191		4.85	4.89	0.04	1.02811	0.748639		4.86	4.9	0.04	1.02811	0.537209		4.86	4.83	-0.03	-1.02101	0.737947		4.86	4.89	0.03	1.02101	0.850966		4.9	4.83	-0.07	-1.04972	0.432355
Bcl2	B cell leukemia/lymphoma 2	1422938_at	6.88	7.04	0.15	1.10957	0.298884		6.88	7	0.12	1.08673	0.398197		6.88	7.16	0.27	1.20581	0.118032		6.88	7.14	0.25	1.18921	0.146693		7.04	7	-0.03	-1.02101	0.552821		7.04	7.16	0.12	1.08673	0.099103		7.04	7.14	0.1	1.07177	0.008239	*	7	7.16	0.15	1.10957	0.073946
Prkcq	protein kinase C, theta	1426044_a_at	6.11	6.1	-0.01	-1.00696	0.822964		6.11	6.08	-0.03	-1.02101	0.58393		6.11	6.22	0.11	1.07923	0.188882		6.11	6.26	0.15	1.10957	0.026392	*	6.1	6.08	-0.02	-1.01396	0.672536		6.1	6.22	0.11	1.07923	0.171877		6.1	6.26	0.15	1.10957	0.024302	*	6.08	6.22	0.13	1.09429	0.130559
Smarcb1	SWI/SNF related, matrix associated, actin dependent regulator of chromatin, subfamily b, member 1	1416045_a_at	8.14	8.12	-0.01	-1.00696	0.841723		8.14	8.17	0.03	1.02101	0.587744		8.14	8.33	0.19	1.14076	0.020314	*	8.14	8.35	0.21	1.15669	0.017454	*	8.12	8.17	0.04	1.02811	0.51089		8.12	8.33	0.21	1.15669	0.036741	*	8.12	8.35	0.22	1.16473	0.025188	*	8.17	8.33	0.16	1.11729	0.02032
Keap1	kelch-like ECH-associated protein 1	1450747_at	6.05	6.07	0.02	1.01396	0.906992		6.05	5.8	-0.25	-1.18921	0.139039		6.05	6.21	0.16	1.11729	0.261263		6.05	6.05	0	-1	0.982262		6.07	5.8	-0.27	-1.20581	0.155		6.07	6.21	0.14	1.10191	0.376099		6.07	6.05	-0.02	-1.01396	0.919987		5.8	6.21	0.41	1.32869	0.020068
Tpst1	protein-tyrosine sulfotransferase 1	1421733_a_at	8.22	8.23	0.02	1.01396	0.723609		8.22	8.02	-0.2	-1.1487	0.00845	*	8.22	8.35	0.13	1.09429	0.144108		8.22	8.27	0.05	1.03526	0.626477		8.23	8.02	-0.22	-1.16473	0.012243	*	8.23	8.35	0.12	1.08673	0.185401		8.23	8.27	0.03	1.02101	0.74448		8.02	8.35	0.33	1.25701	0.0258
Mon2	MON2 homolog (yeast)	1428818_at	3.74	3.79	0.05	1.03526	0.605294		3.74	3.55	-0.19	-1.14076	0.157777		3.74	3.76	0.02	1.01396	0.901485		3.74	3.89	0.14	1.10191	0.288083		3.79	3.55	-0.24	-1.18099	0.089807		3.79	3.76	-0.03	-1.02101	0.793981		3.79	3.89	0.1	1.07177	0.388399		3.55	3.76	0.21	1.15669	0.183877
Stip1	stress-induced phosphoprotein 1	1415909_at	9.46	9.6	0.14	1.10191	0.004116	*	9.46	9.47	0.01	1.00696	0.885637		9.46	9.54	0.08	1.05702	0.012214	*	9.46	9.63	0.17	1.12506	0.185358		9.6	9.47	-0.13	-1.09429	0.158183		9.6	9.54	-0.06	-1.04247	0.068181		9.6	9.63	0.03	1.02101	0.784476		9.47	9.54	0.07	1.04972	0.351061
Mon2	MON2 homolog (yeast)	1440027_at	6.57	6.94	0.37	1.29235	0.091728		6.57	6.5	-0.07	-1.04972	0.341679		6.57	6.77	0.2	1.1487	0.045117	*	6.57	6.83	0.26	1.19748	0.040693	*	6.94	6.5	-0.44	-1.3566	0.055827		6.94	6.77	-0.17	-1.12506	0.313634		6.94	6.83	-0.11	-1.07923	0.484496		6.5	6.77	0.27	1.20581	0.024334
Gpi1	glucose phosphate isomerase 1	1420997_a_at	10.9	10.86	-0.04	-1.02811	0.249826		10.9	10.97	0.07	1.04972	0.112899		10.9	11.09	0.19	1.14076	0.046759	*	10.9	10.95	0.05	1.03526	0.2798		10.86	10.97	0.11	1.07923	0.043284	*	10.86	11.09	0.23	1.17283	0.04451	*	10.86	10.95	0.09	1.06437	0.106156		10.97	11.09	0.11	1.07923	0.13995
Gpi1	glucose phosphate isomerase 1	1450081_x_at	10.67	10.69	0.02	1.01396	0.644536		10.67	10.77	0.09	1.06437	0.088221		10.67	10.84	0.17	1.12506	0.02366	*	10.67	10.74	0.07	1.04972	0.273807		10.69	10.77	0.08	1.05702	0.12505		10.69	10.84	0.15	1.10957	0.032998	*	10.69	10.74	0.05	1.03526	0.379913		10.77	10.84	0.07	1.04972	0.202936
Gpi1	glucose phosphate isomerase 1	1434814_x_at	11.43	11.44	0	-1	0.874042		11.43	11.48	0.05	1.03526	0.223209		11.43	11.52	0.09	1.06437	0.028722	*	11.43	11.45	0.01	1.00696	0.793446		11.44	11.48	0.05	1.03526	0.246469		11.44	11.52	0.08	1.05702	0.03197	*	11.44	11.45	0.01	1.00696	0.842973		11.48	11.52	0.04	1.02811	0.364199
Abcb1b	ATP-binding cassette, sub-family B (MDR/TAP), member 1B	1446701_at	3.34	3.24	-0.1	-1.07177	0.470632		3.34	3.32	-0.01	-1.00696	0.906278		3.34	3.62	0.28	1.21419	0.081567		3.34	3.38	0.04	1.02811	0.735611		3.24	3.32	0.08	1.05702	0.360721		3.24	3.62	0.38	1.30134	0.014772	*	3.24	3.38	0.14	1.10191	0.187014		3.32	3.62	0.3	1.23114	0.019111
Rab37	RAB37, member RAS oncogene family	1450167_at	5.22	4.99	-0.23	-1.17283	0.173597		5.22	5.13	-0.09	-1.06437	0.271985		5.22	5.33	0.11	1.07923	0.424864		5.22	5.43	0.21	1.15669	0.055152		4.99	5.13	0.14	1.10191	0.343384		4.99	5.33	0.34	1.26576	0.096325		4.99	5.43	0.44	1.3566	0.04276	*	5.13	5.33	0.2	1.1487	0.196848
Sort1	sortilin 1	1450955_s_at	6.27	6.31	0.04	1.02811	0.420729		6.27	6.34	0.07	1.04972	0.048503	*	6.27	6.43	0.16	1.11729	0.002753	*	6.27	6.43	0.15	1.10957	0.17336		6.31	6.34	0.03	1.02101	0.459633		6.31	6.43	0.12	1.08673	0.058939		6.31	6.43	0.12	1.08673	0.260211		6.34	6.43	0.09	1.06437	0.021327
Hist1h3d /// Hist1h3e /// Hist1h3g /// Hist1h3h /// Hist1h3i	histone cluster 1, H3d /// histone cluster 1, H3e /// histone cluster 1, H3g /// histone cluster 1, H3h /// histone cluster 1, H3i	1427864_at	3.41	3.2	-0.21	-1.15669	0.202684		3.41	3.26	-0.15	-1.10957	0.352709		3.41	3.38	-0.03	-1.02101	0.906384		3.41	3.37	-0.04	-1.02811	0.745954		3.2	3.26	0.06	1.04247	0.59113		3.2	3.38	0.18	1.13288	0.418684		3.2	3.37	0.16	1.11729	0.047453	*	3.26	3.38	0.12	1.08673	0.576417
Asb6	ankyrin repeat and SOCS box-containing 6	1438182_x_at	7.21	6.93	-0.28	-1.21419	0.04123	*	7.21	7.17	-0.04	-1.02811	0.612439		7.21	7.27	0.06	1.04247	0.520806		7.21	7.21	0	-1	0.974208		6.93	7.17	0.24	1.18099	0.06677		6.93	7.27	0.34	1.26576	0.030095	*	6.93	7.21	0.28	1.21419	0.067813		7.17	7.27	0.1	1.07177	0.345997
Kcna1	potassium voltage-gated channel, shaker-related subfamily, member 1	1442413_at	4.66	4.37	-0.29	-1.22264	0.246067		4.66	4.61	-0.04	-1.02811	0.75961		4.66	4.4	-0.26	-1.19748	0.15559		4.66	4.58	-0.07	-1.04972	0.624259		4.37	4.61	0.25	1.18921	0.283956		4.37	4.4	0.03	1.02101	0.879174		4.37	4.58	0.22	1.16473	0.332089		4.61	4.4	-0.22	-1.16473	0.023761
Atpif1	ATPase inhibitory factor 1	1434198_at	3.71	3.64	-0.07	-1.04972	0.291759		3.71	3.58	-0.13	-1.09429	0.160061		3.71	3.63	-0.08	-1.05702	0.3361		3.71	3.56	-0.15	-1.10957	0.072576		3.64	3.58	-0.07	-1.04972	0.383047		3.64	3.63	-0.02	-1.01396	0.806924		3.64	3.56	-0.08	-1.05702	0.020945	*	3.58	3.63	0.05	1.03526	0.585416
Cyp51	cytochrome P450, family 51	1422534_at	4.95	4.88	-0.07	-1.04972	0.24049		4.95	4.79	-0.15	-1.10957	0.094928		4.95	4.83	-0.12	-1.08673	0.047781	*	4.95	4.93	-0.01	-1.00696	0.918039		4.88	4.79	-0.09	-1.06437	0.281231		4.88	4.83	-0.05	-1.03526	0.368152		4.88	4.93	0.05	1.03526	0.693402		4.79	4.83	0.03	1.02101	0.639276
Mtor	mechanistic target of rapamycin (serine/threonine kinase)	1436267_a_at	6.73	6.74	0.01	1.00696	0.964954		6.73	6.84	0.11	1.07923	0.033055	*	6.73	6.78	0.05	1.03526	0.179567		6.73	6.75	0.02	1.01396	0.586089		6.74	6.84	0.1	1.07177	0.518997		6.74	6.78	0.05	1.03526	0.759155		6.74	6.75	0.01	1.00696	0.929739		6.84	6.78	-0.06	-1.04247	0.05963
Irgm1	immunity-related GTPase family M member 1	1418825_at	7.75	8.02	0.27	1.20581	0.113131		7.75	8.88	1.13	2.18859	0.063806		7.75	8.06	0.31	1.23971	0.021104	*	7.75	8.36	0.61	1.52626	0.338779		8.02	8.88	0.86	1.81504	0.092859		8.02	8.06	0.04	1.02811	0.781519		8.02	8.36	0.34	1.26576	0.563838		8.88	8.06	-0.82	-1.76541	0.108453
Scd1	stearoyl-Coenzyme A desaturase 1	1415964_at	11.69	11.67	-0.02	-1.01396	0.653475		11.69	11.88	0.19	1.14076	0.05027		11.69	11.75	0.06	1.04247	0.442735		11.69	11.77	0.08	1.05702	0.190723		11.67	11.88	0.21	1.15669	0.044269	*	11.67	11.75	0.07	1.04972	0.333911		11.67	11.77	0.1	1.07177	0.132803		11.88	11.75	-0.13	-1.09429	0.164729
Nol3	nucleolar protein 3 (apoptosis repressor with CARD domain)	1451503_at	7.7	7.74	0.04	1.02811	0.634144		7.7	7.89	0.19	1.14076	0.034688	*	7.7	7.74	0.04	1.02811	0.641636		7.7	7.73	0.03	1.02101	0.516685		7.74	7.89	0.15	1.10957	0.114486		7.74	7.74	0	-1	0.972339		7.74	7.73	-0.01	-1.00696	0.921515		7.89	7.74	-0.15	-1.10957	0.151618
Pla2g4a	phospholipase A2, group IVA (cytosolic, calcium-dependent)	1448558_a_at	7.91	8.1	0.19	1.14076	0.084616		7.91	8.69	0.78	1.71713	0.015508	*	7.91	8.15	0.24	1.18099	0.329445		7.91	8.15	0.24	1.18099	0.116352		8.1	8.69	0.59	1.50525	0.037998	*	8.1	8.15	0.04	1.02811	0.839294		8.1	8.15	0.05	1.03526	0.692169		8.69	8.15	-0.55	-1.46409	0.081724
Lgals3bp	lectin, galactoside-binding, soluble, 3 binding protein	1448380_at	7.77	7.73	-0.04	-1.02811	0.847601		7.77	8.71	0.94	1.91853	0.008852	*	7.77	8.07	0.31	1.23971	0.404518		7.77	8.49	0.73	1.65864	0.349844		7.73	8.71	0.98	1.97247	0.010097	*	7.73	8.07	0.34	1.26576	0.375816		7.73	8.49	0.76	1.69349	0.331077		8.71	8.07	-0.64	-1.55833	0.147896
Ctsd	cathepsin D	1448118_a_at	11.32	11.36	0.04	1.02811	0.164344		11.32	11.4	0.08	1.05702	0.043522	*	11.32	11.35	0.03	1.02101	0.423693		11.32	11.38	0.06	1.04247	0.129995		11.36	11.4	0.04	1.02811	0.169906		11.36	11.35	-0.01	-1.00696	0.718937		11.36	11.38	0.02	1.01396	0.45221		11.4	11.35	-0.05	-1.03526	0.170252
Evi2a	ecotropic viral integration site 2a	1450241_a_at	6.47	6.7	0.23	1.17283	0.668724		6.47	7.06	0.59	1.50525	0.323126		6.47	6.88	0.41	1.32869	0.464515		6.47	6.99	0.52	1.43396	0.391376		6.7	7.06	0.36	1.28343	0.04572	*	6.7	6.88	0.18	1.13288	0.35077		6.7	6.99	0.29	1.22264	0.399377		7.06	6.88	-0.18	-1.13288	0.337953
Fech	ferrochelatase	1449181_at	9.13	8.99	-0.14	-1.10191	0.228303		9.13	9.15	0.02	1.01396	0.882689		9.13	8.82	-0.31	-1.23971	0.062101		9.13	8.93	-0.2	-1.1487	0.184391		8.99	9.15	0.16	1.11729	0.106745		8.99	8.82	-0.17	-1.12506	0.181819		8.99	8.93	-0.06	-1.04247	0.598134		9.15	8.82	-0.33	-1.25701	0.042502
Scd1	stearoyl-Coenzyme A desaturase 1	1415965_at	7.53	7.91	0.38	1.30134	0.05002		7.53	8.01	0.48	1.39474	0.011506	*	7.53	7.62	0.09	1.06437	0.489656		7.53	7.55	0.02	1.01396	0.918258		7.91	8.01	0.1	1.07177	0.474062		7.91	7.62	-0.29	-1.22264	0.112373		7.91	7.55	-0.37	-1.29235	0.095335		8.01	7.62	-0.39	-1.31039	0.035601
Msn	moesin	1421814_at	9.48	9.42	-0.06	-1.04247	0.376102		9.48	9.63	0.16	1.11729	0.020975	*	9.48	9.2	-0.28	-1.21419	0.130174		9.48	9.33	-0.14	-1.10191	0.062512		9.42	9.63	0.21	1.15669	0.024577	*	9.42	9.2	-0.22	-1.16473	0.18661		9.42	9.33	-0.09	-1.06437	0.244832		9.63	9.2	-0.44	-1.3566	0.057841
Sbds	Shwachman-Bodian-Diamond syndrome homolog (human)	1426480_at	9.12	9.15	0.02	1.01396	0.706754		9.12	9.18	0.06	1.04247	0.323705		9.12	8.97	-0.16	-1.11729	0.066554		9.12	8.98	-0.14	-1.10191	0.085865		9.15	9.18	0.04	1.02811	0.39753		9.15	8.97	-0.18	-1.13288	0.030493	*	9.15	8.98	-0.16	-1.11729	0.029228	*	9.18	8.97	-0.22	-1.16473	0.026266
Degs1	degenerative spermatocyte homolog 1 (Drosophila)	1423346_at	10.89	10.89	0	-1	0.970727		10.89	11	0.11	1.07923	0.302799		10.89	10.78	-0.11	-1.07923	0.308144		10.89	10.86	-0.03	-1.02101	0.766025		10.89	11	0.1	1.07177	0.051916		10.89	10.78	-0.11	-1.07923	0.087091		10.89	10.86	-0.03	-1.02101	0.40232		11	10.78	-0.21	-1.15669	0.026042
Ell2	elongation factor RNA polymerase II 2	1450744_at	8.26	8.62	0.36	1.28343	0.029271	*	8.26	8.7	0.44	1.3566	0.077669		8.26	8.17	-0.09	-1.06437	0.592122		8.26	8.29	0.03	1.02101	0.76391		8.62	8.7	0.08	1.05702	0.651301		8.62	8.17	-0.45	-1.36604	0.060206		8.62	8.29	-0.32	-1.24833	0.049968	*	8.7	8.17	-0.53	-1.44393	0.056617
Zbtb7b	zinc finger and BTB domain containing 7B	1420663_at	5.85	6	0.15	1.10957	0.205917		5.85	5.86	0.01	1.00696	0.892336		5.85	5.85	0	-1	0.973897		5.85	5.86	0.01	1.00696	0.921017		6	5.86	-0.14	-1.10191	0.040986	*	6	5.85	-0.15	-1.10957	0.051411		6	5.86	-0.14	-1.10191	0.0564		5.86	5.85	-0.02	-1.01396	0.775525
Cycs	cytochrome c, somatic	1422484_at	11.63	11.68	0.05	1.03526	0.506767		11.63	11.56	-0.07	-1.04972	0.384107		11.63	11.5	-0.13	-1.09429	0.246257		11.63	11.58	-0.04	-1.02811	0.647085		11.68	11.56	-0.12	-1.08673	0.037046	*	11.68	11.5	-0.18	-1.13288	0.124196		11.68	11.58	-0.09	-1.06437	0.26896		11.56	11.5	-0.06	-1.04247	0.50837
Mal	myelin and lymphocyte protein, T cell differentiation protein	1417275_at	12.27	12.33	0.06	1.04247	0.284305		12.27	12.16	-0.11	-1.07923	0.120707		12.27	12.16	-0.11	-1.07923	0.122994		12.27	12.23	-0.04	-1.02811	0.519803		12.33	12.16	-0.18	-1.13288	0.011272	*	12.33	12.16	-0.17	-1.12506	0.019701	*	12.33	12.23	-0.1	-1.07177	0.083844		12.16	12.16	0	-1	0.932277
Cycs	cytochrome c, somatic	1456071_a_at	12.19	12.36	0.17	1.12506	0.223662		12.19	12.18	-0.01	-1.00696	0.908663		12.19	12.11	-0.08	-1.05702	0.55773		12.19	12.12	-0.07	-1.04972	0.665545		12.36	12.18	-0.19	-1.14076	0.025891	*	12.36	12.11	-0.25	-1.18921	0.030847	*	12.36	12.12	-0.24	-1.18099	0.126898		12.18	12.11	-0.06	-1.04247	0.4019
Bpnt1	bisphosphate 3'-nucleotidase 1	1449211_at	9.05	9.3	0.24	1.18099	0.113018		9.05	9.05	0	-1	0.999998		9.05	9.03	-0.02	-1.01396	0.883518		9.05	9.08	0.02	1.01396	0.863955		9.3	9.05	-0.24	-1.18099	0.013488	*	9.3	9.03	-0.26	-1.19748	0.074541		9.3	9.08	-0.22	-1.16473	0.106316		9.05	9.03	-0.02	-1.01396	0.847873
Gpm6b	glycoprotein m6b	1423091_a_at	11.67	11.69	0.02	1.01396	0.821887		11.67	11.66	0	-1	0.972136		11.67	11.53	-0.13	-1.09429	0.22351		11.67	11.57	-0.1	-1.07177	0.349619		11.69	11.66	-0.02	-1.01396	0.639762		11.69	11.53	-0.15	-1.10957	0.003608	*	11.69	11.57	-0.12	-1.08673	0.13258		11.66	11.53	-0.13	-1.09429	0.072127
Kcnb1 /// Pacsin2	potassium voltage gated channel, Shab-related subfamily, member 1 /// protein kinase C and casein kinase substrate in neurons 2	1417810_a_at	10.56	10.62	0.06	1.04247	0.085748		10.56	10.57	0.01	1.00696	0.912032		10.56	10.46	-0.1	-1.07177	0.083844		10.56	10.55	-0.01	-1.00696	0.583757		10.62	10.57	-0.05	-1.03526	0.590189		10.62	10.46	-0.16	-1.11729	0.041465	*	10.62	10.55	-0.07	-1.04972	0.001247	*	10.57	10.46	-0.11	-1.07923	0.28694
Snap25	synaptosomal-associated protein 25	1447763_at	6.92	7.21	0.3	1.23114	0.203755		6.92	7.03	0.11	1.07923	0.601303		6.92	6.81	-0.11	-1.07923	0.581701		6.92	6.97	0.05	1.03526	0.79393		7.21	7.03	-0.19	-1.14076	0.241728		7.21	6.81	-0.4	-1.31951	0.030332	*	7.21	6.97	-0.25	-1.18921	0.093629		7.03	6.81	-0.22	-1.16473	0.155409
Prx	periaxin	1423292_a_at	10.19	9.98	-0.21	-1.15669	0.036656	*	10.19	10.16	-0.03	-1.02101	0.53848		10.19	10.27	0.08	1.05702	0.121878		10.19	10.12	-0.07	-1.04972	0.141061		9.98	10.16	0.18	1.13288	0.053929		9.98	10.27	0.29	1.22264	0.014296	*	9.98	10.12	0.14	1.10191	0.105426		10.16	10.27	0.11	1.07923	0.066772
Mobp	myelin-associated oligodendrocytic basic protein	1441308_at	4.51	4.33	-0.18	-1.13288	0.031287	*	4.51	4.43	-0.07	-1.04972	0.568419		4.51	4.43	-0.08	-1.05702	0.449556		4.51	4.31	-0.2	-1.1487	0.187552		4.33	4.43	0.1	1.07177	0.445353		4.33	4.43	0.1	1.07177	0.354729		4.33	4.31	-0.02	-1.01396	0.849237		4.43	4.43	0	-1	0.981541
Fech	ferrochelatase	1418699_s_at	9.56	9.42	-0.14	-1.10191	0.124683		9.56	9.52	-0.03	-1.02101	0.633072		9.56	9.49	-0.06	-1.04247	0.401993		9.56	9.47	-0.09	-1.06437	0.2742		9.42	9.52	0.11	1.07923	0.023435	*	9.42	9.49	0.08	1.05702	0.108595		9.42	9.47	0.05	1.03526	0.213056		9.52	9.49	-0.03	-1.02101	0.464613
Fech	ferrochelatase	1427696_at	4.76	4.55	-0.21	-1.15669	0.046405	*	4.76	4.68	-0.08	-1.05702	0.268907		4.76	4.71	-0.05	-1.03526	0.371814		4.76	4.7	-0.06	-1.04247	0.299432		4.55	4.68	0.13	1.09429	0.151332		4.55	4.71	0.16	1.11729	0.096828		4.55	4.7	0.15	1.10957	0.117089		4.68	4.71	0.03	1.02101	0.582353
Birc2	baculoviral IAP repeat-containing 2	1418854_at	8.79	8.78	-0.01	-1.00696	0.89095		8.79	8.66	-0.12	-1.08673	0.032269	*	8.79	8.79	0	-1	0.958614		8.79	8.86	0.07	1.04972	0.183239		8.78	8.66	-0.12	-1.08673	0.086359		8.78	8.79	0.01	1.00696	0.891303		8.78	8.86	0.08	1.05702	0.22236		8.66	8.79	0.13	1.09429	0.133916
Cfl2	cofilin 2, muscle	1418067_at	10.75	10.83	0.08	1.05702	0.22938		10.75	10.9	0.16	1.11729	0.036297	*	10.75	10.96	0.22	1.16473	0.020966	*	10.75	10.91	0.17	1.12506	0.031056	*	10.83	10.9	0.07	1.04972	0.239801		10.83	10.96	0.13	1.09429	0.08004		10.83	10.91	0.08	1.05702	0.18871		10.9	10.96	0.06	1.04247	0.146063
Aspa	aspartoacylase	1418472_at	7.92	8.13	0.21	1.15669	0.132699		7.92	8.04	0.12	1.08673	0.426879		7.92	8.27	0.34	1.26576	0.140772		7.92	8.29	0.37	1.29235	0.028861	*	8.13	8.04	-0.09	-1.06437	0.467606		8.13	8.27	0.14	1.10191	0.466042		8.13	8.29	0.16	1.11729	0.070703		8.04	8.27	0.23	1.17283	0.293655
Aktip	thymoma viral proto-oncogene 1 interacting protein	1423364_a_at	10.16	10.14	-0.02	-1.01396	0.827831		10.16	10.14	-0.02	-1.01396	0.422346		10.16	10.18	0.02	1.01396	0.58252		10.16	10.25	0.09	1.06437	0.013715	*	10.14	10.14	0	-1	0.999997		10.14	10.18	0.04	1.02811	0.651587		10.14	10.25	0.11	1.07923	0.239702		10.14	10.18	0.04	1.02811	0.336598
Sort1	sortilin 1	1423362_at	9.41	9.34	-0.07	-1.04972	0.313863		9.41	9.3	-0.11	-1.07923	0.187857		9.41	9.54	0.13	1.09429	0.134349		9.41	9.54	0.13	1.09429	0.136627		9.34	9.3	-0.03	-1.02101	0.217651		9.34	9.54	0.2	1.1487	0.003414	*	9.34	9.54	0.21	1.15669	0.029975	*	9.3	9.54	0.23	1.17283	0.003469
Itpr3	inositol 1,4,5-triphosphate receptor 3	1417297_at	8.52	8.43	-0.09	-1.06437	0.270791		8.52	8.42	-0.1	-1.07177	0.091615		8.52	8.58	0.06	1.04247	0.262878		8.52	8.58	0.06	1.04247	0.243796		8.43	8.42	-0.01	-1.00696	0.889125		8.43	8.58	0.15	1.10957	0.125905		8.43	8.58	0.15	1.10957	0.117197		8.42	8.58	0.16	1.11729	0.012353
Fez1	fasciculation and elongation protein zeta 1 (zygin I)	1454674_at	10.62	10.58	-0.04	-1.02811	0.452504		10.62	10.52	-0.1	-1.07177	0.112115		10.62	10.74	0.12	1.08673	0.035756	*	10.62	10.71	0.09	1.06437	0.339983		10.58	10.52	-0.06	-1.04247	0.271338		10.58	10.74	0.16	1.11729	0.01999	*	10.58	10.71	0.12	1.08673	0.208379		10.52	10.74	0.22	1.16473	0.014835
Map2k7	mitogen-activated protein kinase kinase 7	1425512_at	8.25	8.09	-0.16	-1.11729	0.118281		8.25	8.05	-0.2	-1.1487	0.004767	*	8.25	8.28	0.03	1.02101	0.591304		8.25	8.32	0.07	1.04972	0.109954		8.09	8.05	-0.04	-1.02811	0.573273		8.09	8.28	0.19	1.14076	0.08142		8.09	8.32	0.23	1.17283	0.058765		8.05	8.28	0.23	1.17283	0.027451
Atrn	attractin	1434197_at	8.75	8.74	0	-1	0.924366		8.75	8.58	-0.17	-1.12506	0.033269	*	8.75	8.78	0.04	1.02811	0.652828		8.75	8.79	0.04	1.02811	0.409572		8.74	8.58	-0.16	-1.11729	0.026434	*	8.74	8.78	0.04	1.02811	0.637279		8.74	8.79	0.05	1.03526	0.417906		8.58	8.78	0.2	1.1487	0.080759
Ina	internexin neuronal intermediate filament protein, alpha	1418178_at	9.53	9.67	0.14	1.10191	0.024523	*	9.53	9.2	-0.33	-1.25701	0.004118	*	9.53	9.35	-0.18	-1.13288	0.404304		9.53	9.29	-0.24	-1.18099	0.070245		9.67	9.2	-0.47	-1.38511	0.003794	*	9.67	9.35	-0.32	-1.24833	0.197553		9.67	9.29	-0.38	-1.30134	0.021849	*	9.2	9.35	0.16	1.11729	0.450329
Ina	internexin neuronal intermediate filament protein, alpha	1448992_at	9.3	9.38	0.08	1.05702	0.350921		9.3	8.92	-0.38	-1.30134	0.002574	*	9.3	9.32	0.02	1.01396	0.84812		9.3	9.25	-0.05	-1.03526	0.306149		9.38	8.92	-0.46	-1.37554	0.008674	*	9.38	9.32	-0.06	-1.04247	0.64128		9.38	9.25	-0.13	-1.09429	0.171198		8.92	9.32	0.4	1.31951	0.038069
Ina	internexin neuronal intermediate filament protein, alpha	1448991_a_at	10.42	10.55	0.14	1.10191	0.016003	*	10.42	10	-0.42	-1.33793	0.001121	*	10.42	10.4	-0.02	-1.01396	0.855643		10.42	10.28	-0.14	-1.10191	0.166234		10.55	10	-0.55	-1.46409	0.000233	*	10.55	10.4	-0.16	-1.11729	0.240035		10.55	10.28	-0.28	-1.21419	0.040675	*	10	10.4	0.4	1.31951	0.042488
Kcna1	potassium voltage-gated channel, shaker-related subfamily, member 1	1437230_at	11.47	11.43	-0.04	-1.02811	0.304961		11.47	11.32	-0.15	-1.10957	0.024498	*	11.47	11.31	-0.17	-1.12506	0.290628		11.47	11.28	-0.19	-1.14076	0.033669	*	11.43	11.32	-0.11	-1.07923	0.010822	*	11.43	11.31	-0.12	-1.08673	0.405016		11.43	11.28	-0.15	-1.10957	0.08445		11.32	11.31	-0.01	-1.00696	0.920583
Kcna1	potassium voltage-gated channel, shaker-related subfamily, member 1	1455785_at	12.47	12.4	-0.07	-1.04972	0.074146		12.47	12.36	-0.11	-1.07923	0.042608	*	12.47	12.34	-0.13	-1.09429	0.337428		12.47	12.35	-0.12	-1.08673	0.031	*	12.4	12.36	-0.05	-1.03526	0.279247		12.4	12.34	-0.06	-1.04247	0.616963		12.4	12.35	-0.05	-1.03526	0.229124		12.36	12.34	-0.01	-1.00696	0.909578
Mal	myelin and lymphocyte protein, T cell differentiation protein	1432558_a_at	11.68	11.66	-0.02	-1.01396	0.72169		11.68	11.46	-0.22	-1.16473	0.029634	*	11.68	11.59	-0.09	-1.06437	0.140123		11.68	11.57	-0.11	-1.07923	0.131471		11.66	11.46	-0.2	-1.1487	0.054389		11.66	11.59	-0.08	-1.05702	0.10786		11.66	11.57	-0.09	-1.06437	0.145597		11.46	11.59	0.12	1.08673	0.115458
Birc2	baculoviral IAP repeat-containing 2	1430752_at	6.58	6.49	-0.09	-1.06437	0.124418		6.58	6.35	-0.23	-1.17283	0.136199		6.58	6.42	-0.16	-1.11729	0.159341		6.58	6.36	-0.22	-1.16473	0.034246	*	6.49	6.35	-0.14	-1.10191	0.288495		6.49	6.42	-0.08	-1.05702	0.433724		6.49	6.36	-0.14	-1.10191	0.114358		6.35	6.42	0.06	1.04247	0.6417
Lhfpl3	lipoma HMGIC fusion partner-like 3	1429592_at	8.63	8.77	0.14	1.10191	0.235918		8.63	8.2	-0.43	-1.34723	0.017641	*	8.63	8.43	-0.2	-1.1487	0.226887		8.63	8.38	-0.25	-1.18921	0.095461		8.77	8.2	-0.57	-1.48452	0.002308	*	8.77	8.43	-0.34	-1.26576	0.074891		8.77	8.38	-0.39	-1.31039	0.021917	*	8.2	8.43	0.23	1.17283	0.165962
Qk	quaking	1425597_a_at	7.92	8.4	0.47	1.38511	0.017575	*	7.92	7.7	-0.22	-1.16473	0.120101		7.92	7.99	0.06	1.04247	0.579428		7.92	7.73	-0.19	-1.14076	0.155009		8.4	7.7	-0.7	-1.6245	0.011651	*	8.4	7.99	-0.41	-1.32869	0.020308	*	8.4	7.73	-0.66	-1.58008	0.004354	*	7.7	7.99	0.29	1.22264	0.026793
Egr2	early growth response 2	1427682_a_at	9.9	10.51	0.61	1.52626	0.005992	*	9.9	10.04	0.14	1.10191	0.651568		9.9	10.18	0.28	1.21419	0.03722	*	9.9	10.17	0.27	1.20581	0.062465		10.51	10.04	-0.47	-1.38511	0.207736		10.51	10.18	-0.33	-1.25701	0.040779	*	10.51	10.17	-0.34	-1.26576	0.046891	*	10.04	10.18	0.14	1.10191	0.653008
Fnta	farnesyltransferase, CAAX box, alpha	1447904_s_at	11.47	11.59	0.13	1.09429	0.001925	*	11.47	11.43	-0.03	-1.02101	0.136362		11.47	11.54	0.07	1.04972	0.232539		11.47	11.53	0.06	1.04247	0.203847		11.59	11.43	-0.16	-1.11729	0.005994	*	11.59	11.54	-0.06	-1.04247	0.307428		11.59	11.53	-0.06	-1.04247	0.208085		11.43	11.54	0.1	1.07177	0.119871
Cyp51	cytochrome P450, family 51	1450646_at	7.73	8.11	0.38	1.30134	0.038747	*	7.73	7.74	0.01	1.00696	0.948298		7.73	7.87	0.14	1.10191	0.242138		7.73	7.82	0.09	1.06437	0.400064		8.11	7.74	-0.37	-1.29235	0.005532	*	8.11	7.87	-0.24	-1.18099	0.030359	*	8.11	7.82	-0.29	-1.22264	0.002359	*	7.74	7.87	0.13	1.09429	0.123923
Adamts4	a disintegrin-like and metallopeptidase (reprolysin type) with thrombospondin type 1 motif, 4	1452595_at	5.71	6.12	0.41	1.32869	0.039965	*	5.71	5.72	0.01	1.00696	0.934636		5.71	5.9	0.18	1.13288	0.088716		5.71	5.91	0.19	1.14076	0.404047		6.12	5.72	-0.4	-1.31951	0.02778	*	6.12	5.9	-0.22	-1.16473	0.122048		6.12	5.91	-0.21	-1.15669	0.377074		5.72	5.9	0.18	1.13288	0.135309
Nap1l2	nucleosome assembly protein 1-like 2	1418046_at	10.55	10.7	0.15	1.10957	0.031118	*	10.55	10.54	-0.01	-1.00696	0.940224		10.55	10.65	0.1	1.07177	0.425296		10.55	10.59	0.04	1.02811	0.483909		10.7	10.54	-0.16	-1.11729	0.156109		10.7	10.65	-0.05	-1.03526	0.670666		10.7	10.59	-0.11	-1.07923	0.089482		10.54	10.65	0.11	1.07923	0.441087
Gjb1	gap junction protein, beta 1	1448767_s_at	6.85	7.27	0.42	1.33793	0.087107		6.85	6.81	-0.04	-1.02811	0.81568		6.85	7.36	0.51	1.42405	0.071359		6.85	7.13	0.28	1.21419	0.201106		7.27	6.81	-0.47	-1.38511	0.014765	*	7.27	7.36	0.09	1.06437	0.636206		7.27	7.13	-0.15	-1.10957	0.196099		6.81	7.36	0.55	1.46409	0.042299
Gjb1	gap junction protein, beta 1	1448766_at	5.86	6.35	0.49	1.40444	0.029133	*	5.86	5.85	-0.01	-1.00696	0.958883		5.86	6.28	0.41	1.32869	0.118279		5.86	6.22	0.36	1.28343	0.158894		6.35	5.85	-0.5	-1.41421	0.061087		6.35	6.28	-0.07	-1.04972	0.710781		6.35	6.22	-0.13	-1.09429	0.536998		5.85	6.28	0.42	1.33793	0.129578
Gal3st1	galactose-3-O-sulfotransferase 1	1454078_a_at	7.94	7.98	0.04	1.02811	0.333975		7.94	7.71	-0.22	-1.16473	0.003752	*	7.94	8.05	0.11	1.07923	0.028288	*	7.94	8.01	0.07	1.04972	0.34234		7.98	7.71	-0.26	-1.19748	0.002411	*	7.98	8.05	0.07	1.04972	0.101581		7.98	8.01	0.03	1.02101	0.664455		7.71	8.05	0.34	1.26576	0.002953
Idh3a	isocitrate dehydrogenase 3 (NAD+) alpha	1432016_a_at	11.49	11.55	0.06	1.04247	0.168909		11.49	11.37	-0.11	-1.07923	0.139962		11.49	11.55	0.06	1.04247	0.218203		11.49	11.53	0.05	1.03526	0.157673		11.55	11.37	-0.18	-1.13288	0.045214	*	11.55	11.55	0	-1	1		11.55	11.53	-0.02	-1.01396	0.682475		11.37	11.55	0.18	1.13288	0.046539
Bin1	bridging integrator 1	1444120_at	5.92	6.08	0.17	1.12506	0.097516		5.92	5.72	-0.2	-1.1487	0.162714		5.92	6	0.08	1.05702	0.150178		5.92	5.95	0.04	1.02811	0.301202		6.08	5.72	-0.36	-1.28343	0.038196	*	6.08	6	-0.09	-1.06437	0.301669		6.08	5.95	-0.13	-1.09429	0.154681		5.72	6	0.28	1.21419	0.081467
Ugt8a	UDP galactosyltransferase 8A	1419063_at	11.5	11.68	0.18	1.13288	0.030152	*	11.5	11.24	-0.26	-1.19748	0.022665	*	11.5	11.56	0.06	1.04247	0.40742		11.5	11.48	-0.02	-1.01396	0.887953		11.68	11.24	-0.44	-1.3566	0.010868	*	11.68	11.56	-0.12	-1.08673	0.15345		11.68	11.48	-0.2	-1.1487	0.180952		11.24	11.56	0.32	1.24833	0.014424
Snap25	synaptosomal-associated protein 25	1416828_at	13.43	13.48	0.05	1.03526	0.287935		13.43	13.37	-0.06	-1.04247	0.235757		13.43	13.43	0	-1	0.956399		13.43	13.45	0.02	1.01396	0.674935		13.48	13.37	-0.11	-1.07923	0.024243	*	13.48	13.43	-0.05	-1.03526	0.43158		13.48	13.45	-0.03	-1.02101	0.45903		13.37	13.43	0.06	1.04247	0.327585
Kcna1	potassium voltage-gated channel, shaker-related subfamily, member 1	1417416_at	12.27	12.2	-0.07	-1.04972	0.051069		12.27	12.16	-0.12	-1.08673	0.038207	*	12.27	12.21	-0.06	-1.04247	0.605444		12.27	12.22	-0.05	-1.03526	0.475565		12.2	12.16	-0.04	-1.02811	0.298463		12.2	12.21	0.01	1.00696	0.93286		12.2	12.22	0.02	1.01396	0.780158		12.16	12.21	0.05	1.03526	0.664182
Lhfpl3	lipoma HMGIC fusion partner-like 3	1433990_at	9.53	9.48	-0.04	-1.02811	0.51289		9.53	9.17	-0.36	-1.28343	0.00351	*	9.53	9.47	-0.06	-1.04247	0.664636		9.53	9.49	-0.03	-1.02101	0.526688		9.48	9.17	-0.32	-1.24833	0.01289	*	9.48	9.47	-0.02	-1.01396	0.907219		9.48	9.49	0.01	1.00696	0.893166		9.17	9.47	0.3	1.23114	0.119434
Idh3a	isocitrate dehydrogenase 3 (NAD+) alpha	1422501_s_at	9.43	9.35	-0.08	-1.05702	0.481605		9.43	9.23	-0.2	-1.1487	0.042304	*	9.43	9.4	-0.02	-1.01396	0.65101		9.43	9.39	-0.04	-1.02811	0.570583		9.35	9.23	-0.12	-1.08673	0.319795		9.35	9.4	0.05	1.03526	0.626761		9.35	9.39	0.04	1.02811	0.722864		9.23	9.4	0.17	1.12506	0.056717
Idh3a	isocitrate dehydrogenase 3 (NAD+) alpha	1422500_at	8.69	8.64	-0.04	-1.02811	0.690933		8.69	8.52	-0.17	-1.12506	0.006809	*	8.69	8.65	-0.04	-1.02811	0.670278		8.69	8.64	-0.05	-1.03526	0.354942		8.64	8.52	-0.12	-1.08673	0.318226		8.64	8.65	0.01	1.00696	0.958276		8.64	8.64	-0.01	-1.00696	0.952673		8.52	8.65	0.13	1.09429	0.213724
Rap1gds1	RAP1, GTP-GDP dissociation stimulator 1	1425266_a_at	9.64	9.69	0.05	1.03526	0.364034		9.64	9.4	-0.24	-1.18099	0.014163	*	9.64	9.68	0.04	1.02811	0.726329		9.64	9.63	-0.01	-1.00696	0.819431		9.69	9.4	-0.29	-1.22264	0.006646	*	9.69	9.68	-0.01	-1.00696	0.905248		9.69	9.63	-0.06	-1.04247	0.212213		9.4	9.68	0.28	1.21419	0.08162
Nfasc	neurofascin	1456068_at	8.37	8.34	-0.03	-1.02101	0.532301		8.37	8.22	-0.15	-1.10957	0.022317	*	8.37	8.45	0.08	1.05702	0.561842		8.37	8.36	-0.01	-1.00696	0.777815		8.34	8.22	-0.12	-1.08673	0.084126		8.34	8.45	0.11	1.07923	0.429123		8.34	8.36	0.02	1.01396	0.642045		8.22	8.45	0.23	1.17283	0.164141
Tnfrsf21	tumor necrosis factor receptor superfamily, member 21	1450731_s_at	10.11	10.08	-0.04	-1.02811	0.646797		10.11	9.78	-0.34	-1.26576	0.003611	*	10.11	9.98	-0.13	-1.09429	0.469525		10.11	9.96	-0.16	-1.11729	0.025805	*	10.08	9.78	-0.3	-1.23114	0.022477	*	10.08	9.98	-0.1	-1.07177	0.598552		10.08	9.96	-0.12	-1.08673	0.190986		9.78	9.98	0.2	1.1487	0.305953
Map2k7	mitogen-activated protein kinase kinase 7	1451736_a_at	9.94	10.09	0.15	1.10957	0.106237		9.94	9.81	-0.12	-1.08673	0.149526		9.94	9.94	0	-1	0.999997		9.94	9.89	-0.05	-1.03526	0.51013		10.09	9.81	-0.28	-1.21419	0.000459	*	10.09	9.94	-0.15	-1.10957	0.074989		10.09	9.89	-0.2	-1.1487	0.027488	*	9.81	9.94	0.12	1.08673	0.106153
Unc50	unc-50 homolog (C. elegans)	1421982_a_at	9.41	9.23	-0.18	-1.13288	0.031714	*	9.41	9.33	-0.09	-1.06437	0.255406		9.41	9.41	0	-1	0.946944		9.41	9.45	0.04	1.02811	0.496343		9.23	9.33	0.1	1.07177	0.182236		9.23	9.41	0.18	1.13288	0.022437	*	9.23	9.45	0.22	1.16473	0.007064	*	9.33	9.41	0.08	1.05702	0.224085
Sspn	sarcospan	1417644_at	8.54	8.24	-0.3	-1.23114	0.005393	*	8.54	8.44	-0.1	-1.07177	0.122712		8.54	8.52	-0.02	-1.01396	0.882012		8.54	8.49	-0.05	-1.03526	0.503554		8.24	8.44	0.2	1.1487	0.022557	*	8.24	8.52	0.28	1.21419	0.080019		8.24	8.49	0.25	1.18921	0.032464	*	8.44	8.52	0.08	1.05702	0.46955
Gpr137b /// Gpr137b-ps	G protein-coupled receptor 137B /// G protein-coupled receptor 137B, pseudogene	1423164_at	7.8	7.67	-0.13	-1.09429	0.088211		7.8	7.72	-0.08	-1.05702	0.183217		7.8	7.86	0.06	1.04247	0.29698		7.8	7.85	0.05	1.03526	0.428233		7.67	7.72	0.05	1.03526	0.362791		7.67	7.86	0.19	1.14076	0.023548	*	7.67	7.85	0.18	1.13288	0.033907	*	7.72	7.86	0.14	1.10191	0.017381
Sp7	Sp7 transcription factor 7	1418425_at	6.09	5.87	-0.23	-1.17283	0.35468		6.09	5.69	-0.41	-1.32869	0.156456		6.09	6.08	-0.01	-1.00696	0.966409		6.09	6.01	-0.08	-1.05702	0.701739		5.87	5.69	-0.18	-1.13288	0.110369		5.87	6.08	0.22	1.16473	0.194353		5.87	6.01	0.14	1.10191	0.173919		5.69	6.08	0.4	1.31951	0.056156
Smpd3	sphingomyelin phosphodiesterase 3, neutral	1422779_at	6.65	5.79	-0.87	-1.82766	0.008713	*	6.65	6.08	-0.57	-1.48452	0.025164	*	6.65	6.22	-0.44	-1.3566	0.074129		6.65	6.37	-0.29	-1.22264	0.151865		5.79	6.08	0.29	1.22264	0.141927		5.79	6.22	0.43	1.34723	0.078907		5.79	6.37	0.58	1.49485	0.046086	*	6.08	6.22	0.14	1.10191	0.250018
Smpd3	sphingomyelin phosphodiesterase 3, neutral	1438665_at	7.43	6.5	-0.93	-1.90528	0.041687	*	7.43	6.7	-0.73	-1.65864	0.076211		7.43	6.9	-0.52	-1.43396	0.158601		7.43	6.96	-0.46	-1.37554	0.18842		6.5	6.7	0.2	1.1487	0.251329		6.5	6.9	0.41	1.32869	0.067904		6.5	6.96	0.47	1.38511	0.04315	*	6.7	6.9	0.2	1.1487	0.177473
Smpd3	sphingomyelin phosphodiesterase 3, neutral	1450748_at	6.08	5.72	-0.36	-1.28343	0.058406		6.08	5.61	-0.46	-1.37554	0.031646	*	6.08	5.85	-0.23	-1.17283	0.146795		6.08	5.74	-0.34	-1.26576	0.089952		5.72	5.61	-0.11	-1.07923	0.400402		5.72	5.85	0.13	1.09429	0.12406		5.72	5.74	0.02	1.01396	0.877991		5.61	5.85	0.24	1.18099	0.122265
Lama2	laminin, alpha 2	1426285_at	9.87	9.66	-0.21	-1.15669	0.037064	*	9.87	9.61	-0.27	-1.20581	0.027397	*	9.87	9.76	-0.11	-1.07923	0.131007		9.87	9.71	-0.16	-1.11729	0.157066		9.66	9.61	-0.06	-1.04247	0.447309		9.66	9.76	0.1	1.07177	0.052749		9.66	9.71	0.05	1.03526	0.605662		9.61	9.76	0.16	1.11729	0.104177
Rps4x	ribosomal protein S4, X-linked	1420303_x_at	5.08	5.11	0.03	1.02101	0.811632		5.08	5.01	-0.07	-1.04972	0.723866		5.08	5.19	0.11	1.07923	0.429796		5.08	5.24	0.16	1.11729	0.272514		5.11	5.01	-0.1	-1.07177	0.569065		5.11	5.19	0.08	1.05702	0.227055		5.11	5.24	0.13	1.09429	0.012578	*	5.01	5.19	0.18	1.13288	0.347278
Slc35a2	solute carrier family 35 (UDP-galactose transporter), member A2	1422827_x_at	6.37	6.36	-0.02	-1.01396	0.877056		6.37	6.38	0.01	1.00696	0.928473		6.37	6.47	0.1	1.07177	0.39442		6.37	6.48	0.11	1.07923	0.370318		6.36	6.38	0.03	1.02101	0.641492		6.36	6.47	0.12	1.08673	0.044628	*	6.36	6.48	0.12	1.08673	0.048133	*	6.38	6.47	0.09	1.06437	0.166897
Gpr137b /// Gpr137b-ps	G protein-coupled receptor 137B /// G protein-coupled receptor 137B, pseudogene	1429775_a_at	7.95	8	0.05	1.03526	0.609099		7.95	8.09	0.14	1.10191	0.239142		7.95	8.29	0.34	1.26576	0.052524		7.95	8.22	0.27	1.20581	0.073729		8	8.09	0.09	1.06437	0.191528		8	8.29	0.29	1.22264	0.002374	*	8	8.22	0.22	1.16473	0.009487	*	8.09	8.29	0.2	1.1487	0.036322
Ugt8a	UDP galactosyltransferase 8A	1419064_a_at	9.03	9.34	0.32	1.24833	0.019116	*	9.03	8.86	-0.17	-1.12506	0.269737		9.03	9.39	0.37	1.29235	0.031583	*	9.03	9.26	0.24	1.18099	0.13148		9.34	8.86	-0.49	-1.40444	0.042705	*	9.34	9.39	0.05	1.03526	0.631931		9.34	9.26	-0.08	-1.05702	0.517553		8.86	9.39	0.54	1.45397	0.021479
Bpnt1	bisphosphate 3'-nucleotidase 1	1418764_a_at	8.27	8.46	0.18	1.13288	0.098493		8.27	8.22	-0.05	-1.03526	0.459822		8.27	8.53	0.26	1.19748	0.060627		8.27	8.52	0.24	1.18099	0.051441		8.46	8.22	-0.24	-1.18099	0.049705	*	8.46	8.53	0.08	1.05702	0.490923		8.46	8.52	0.06	1.04247	0.54977		8.22	8.53	0.31	1.23971	0.046387
[truncated: 15 more columns]
