# Supplementary material
Source: HighWire-hosted journal article supplement (https://www.jneurosci.org/content/38/10/2551)
Supplement: inline-supplementary-material-9 [file inline-supplementary-material-9.xlsx]

## Sheet: Figure 1-1
Figure 1-1 | Control vs. D3 noise wave I amplitude comparisons.
Group	Frequency (kHz)	Intensity (dB)	Sample size	Mean	± SEM	P value
			(number of mice)
Control	5.6	70	10	1.03	0.152	0.0184
D3 Noise			15	0.6323	0.06376
Control	11.3	60	17	1.848	0.1105	0.0429
D3 Noise			11	1.318	0.189
Control	11.3	70	17	2.399	0.1613	0.002
D3 Noise			15	1.439	0.2449
Control	11.3	80	17	4.362	0.2546	<0.0001
D3 Noise			17	2.448	0.4429
Control	11.3	90	16	7.435	0.5413	<0.0001
D3 Noise			17	3.797	0.51
Control	16	70	17	1.768	0.1236	0.0023
D3 Noise			11	0.9914	0.232
Control	16	80	17	2.451	0.17	0.0004
D3 Noise			13	1.463	0.3641
Control	16	90	17	3.88	0.3763	0.0002
D3 Noise			17	2.035	0.4677
Control	32	70	17	1.37	0.1543	0.0002
D3 Noise			8	0.5131	0.07221
Control	32	80	17	1.71	0.1629	<0.0001
D3 Noise			11	0.6377	0.102
Control	32	90	17	2.687	0.3468	<0.0001
D3 Noise			17	0.9782	0.1634
Exact mean ± SEM and p values shown are for each significantly different control and D3 noise wave I amplitude comparisons shown in Figure 1k. Statistical analyses were performed using the Mann-Whitney non-parametric test.

## Sheet: Figure 2-1
Figure 2-1 | Control vs. D3 noise wave I latency comparisons.
Group	Frequency (kHz)	Intensity (dB)	Sample size	Mean	± SEM	P value
			(number of mice)
Control	11.3	60	17	2.175	0.04938	0.0426
D3 Noise			11	2.32	0.06506
Control	16	80	17	2.103	0.05278	0.019
D3 Noise			14	2.257	0.04798
Control	16	90	17	2.051	0.0487	0.0432
D3 Noise			17	2.176	0.03843
Control	32	70	17	2.073	0.05903	0.0049
D3 Noise			8	2.344	0.05388
Control	32	80	17	2.022	0.05866	0.006
D3 Noise			11	2.214	0.04259
Control	32	90	17	1.996	0.05033	0.0087
D3 Noise			17	2.241	0.07513
Exact mean ± SEM and p values shown are for each significantly different control and D3 noise wave I latency comparisons shown in Figure 2o. Statistical analyses were performed using the Mann-Whitney non-parametric test.

## Sheet: Figure 5-3
Figure 5-3 | Validation of mRNA differential expression by quantitative PCR.
Category	Gene		Microarray1		qPCR2
	symbol	Probe Set ID3	Log FC4	p-value5	Log FC4	p-value5
Myelin-related	Cdc42	1460708_s_at	0.3	0.04	0.6	0.009
and putative	Gal3st1	1454078_a_at	0.2	0.004	0.4	0.394
QKI target	Irgm1	1418825_at	1.1	0.064	1.2	0.177
	Rap1gds1	1425266_a_at	0.2	0.014	0.2	0.564
	Ugt8a	1419063_at	0.3	0.023	0.6	0.322
Immune	C1qa	1417381_at	0.9	0.017	1.2	0.106
Response/	C1qb	1417063_at	1.1	<0.001	1.5	0.196
Inflammation	C1qc	1449401_at	1	<0.001	1.6	0.151
	Ifit3	1449025_at	1.9	0.03	2.2	0.03
	Ccl12	1419282_at	3.6	0.016	3.4	0.016
Other	Pou3f2	1453478_at	0.5	0.039	0.2	0.271
	Cxcr4	1448710_at	0.5	0.342	1	0.111
	Gadd45a	1449519_at	1.8	0.018	1.2	0.018
1Expression and annotation data from microarray analysis of control and 1-day post noise exposure samples (n = 3 per group).
2Expression data for qPCR analysis of control (n = 2 mice) and 1-day post noise exposure (n = 3 mice) samples
3Probe set ID, Affymetrix Mouse 430 2.0 microarray
4Log fold change (i.e., difference of log2 expression means)
5Student’s t-test, unpaired, 2-tailed

## Sheet: Figure 6-1
Figure 6-1 | Quaking variants expression in development.
Gene assay	ANOVA	Degrees of freedom (numerator, denominator)	F value	Bonferroni's post-test	Multiplicity adjusted P value
	P value
QKI-5	0.02	2, 6	8.053	P3 vs. P14	0.0286
QKI-6	0.0197	2, 6	8.107	P3 vs. P14	0.0281
QKI-7	<0.0001	2, 6	93.8	P3 vs. P7	0.0429
QKI-7				P3 vs. P14	<0.0001
QKI-7				P7 vs. P14	0.0002
Pan-QKI	0.0029	2, 6	17.94	P3 vs. P14	0.0029
mRNA expression values of Quaking variants among the developmental time periods were compared using ordinary one-way ANOVA in conjunction with Bonferroni’s post-test as shown in Figure 6a. n = 3 mice per each developmental time point.

## Sheet: Figure 7-1
Figure 7-1 | Pan-QKI+/Sox10+/DAPI+ cell density comparisons between QKIFL/FL;- and QKIFL/FL;PLPCreERT.
Group	Cochlear Turn	Mean	± SEM	P value
QKIFL/FL;-	Apical OSL	91.48	8.766	0.0286
QKIFL/FL;PLPCreERT		3.747	3.422
QKIFL/FL;-	Middle OSL	96.48	2.08	0.0286
QKIFL/FL;PLPCreERT		1.165	0.9557
QKIFL/FL;-	Basal OSL	103.2	5.51	0.0286
QKIFL/FL;PLPCreERT		1.25	0.9462
QKIFL/FL;-	Apical RC	52.67	2.889	0.0286
QKIFL/FL;PLPCreERT		25.05	3.996
QKIFL/FL;-	Middle RC	61.37	1.546	0.0286
QKIFL/FL;PLPCreERT		24.95	2.735
QKIFL/FL;-	Basal RC	59.62	1.932	0.0286
QKIFL/FL;PLPCreERT		19.1	5.01
Exact mean ± SEM and p values shown are for each significantly different Pan-QKI+/Sox10+/DAPI+ cell density counts between control QKIFL/FL;- and mutant QKIFL/FL;PLPCreERT mice as shown in Figure 7e (OSL) and 7f (RC). Statistical analyses were performed using the Mann-Whitney non-parametric test. n = 4 mice per QKIFL/FL;- and QKIFL/FL;PLPCreERT groups.

## Sheet: Figure 8-1
Figure 8-1 | QKIFL/FL;PLPCreERT and control QKIFL/FL;- wave I latency comparisons.
Group	Frequency (kHz)	Intensity (dB)	Sample size (number of mice)	Degrees of freedom	T value	Mean	± SEM	P value
QKIFL/FL;-	8	70	4	5	3.568	2.09	0.03189	0.0161
QKIFL/FL;PLPCreERT			3			2.323	0.06386
QKIFL/FL;-	8	80	4	6	2.973	1.866	0.06156	0.0249
QKIFL/FL;PLPCreERT			4			2.286	0.1272
QKIFL/FL;-	8	90	4	6	2.525	1.81	0.06494	0.045
QKIFL/FL;PLPCreERT			4			2.189	0.1352
QKIFL/FL;-	16	80	4	6	2.688	1.89	0.06069	0.0362
QKIFL/FL;PLPCreERT			4			2.153	0.07653
Exact mean ± SEM, p values, and test statistics are shown are for each significantly different QKIFL/FL;- and QKIFL/FL;PLPCreERT wave I latency comparisons shown in Figure 8s. Statistical analyses were performed using unpaired, two-tailed Student’s t test.
